# Supplementary figures and images for: Accuracies of Genomic Prediction for Growth Traits at Weaning and Yearling Ages in Yak
Source: MDPI journal article supplement (doi:10.3390/ani10101793), 2020-10-02

## MAF distribution

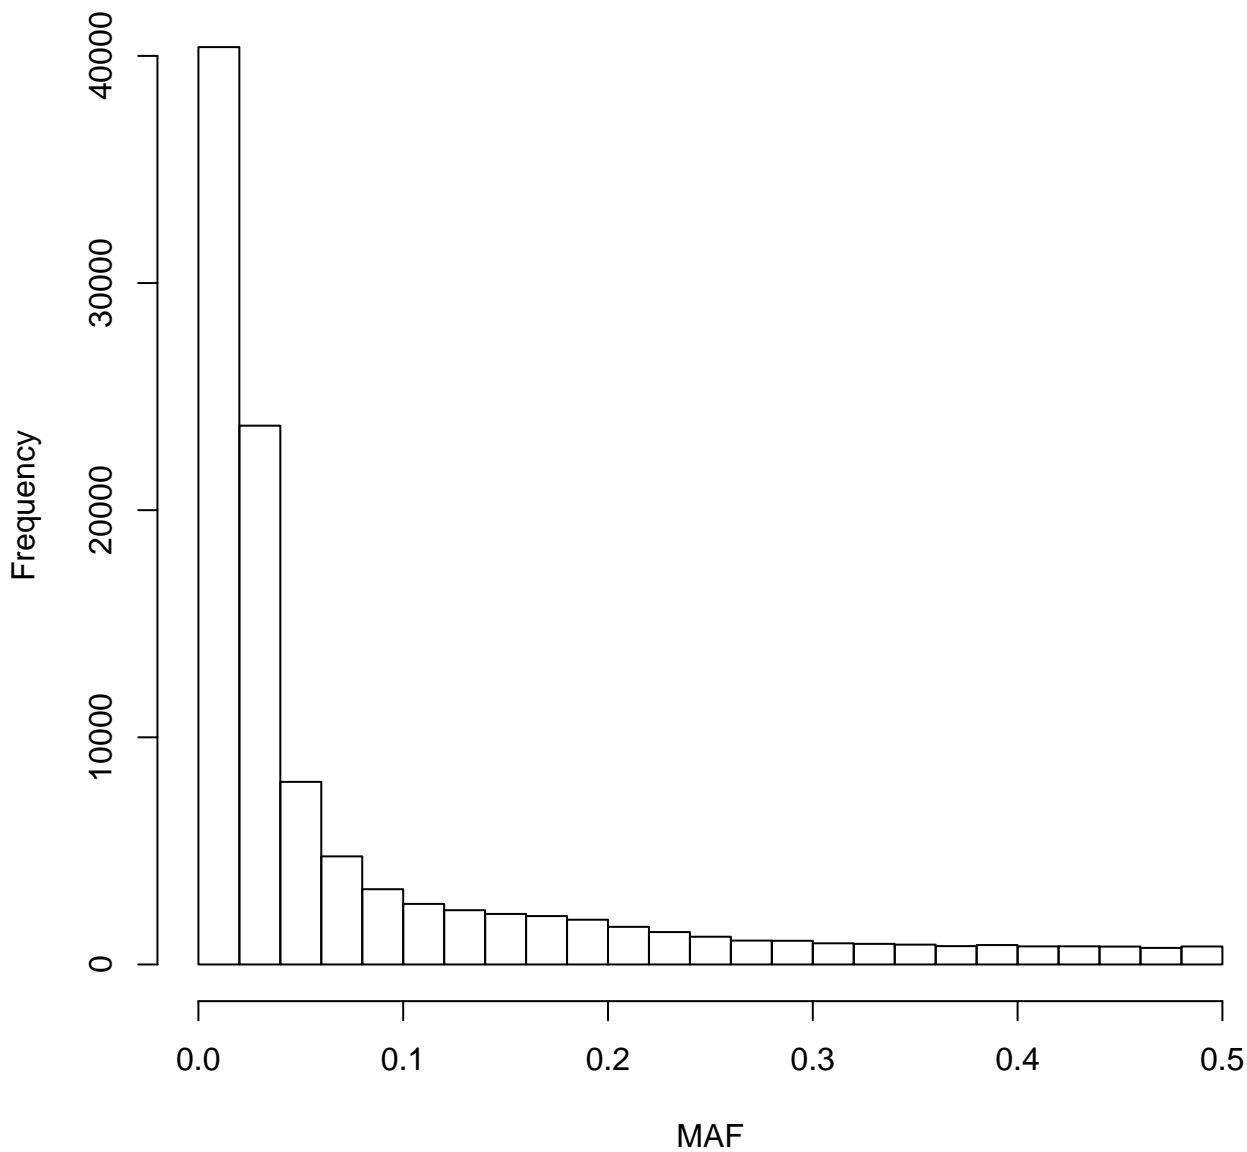

Supplement: s1 [file s1]
